# Supplementary material for: Impact of flanking chromosomal sequences on localization and silencing by the human non-coding RNA XIST
Source: PubMed Central journal article supplement (PMC4591629; doi:10.1186/s13059-015-0774-2), 2015-10-02
Supplement: 13059_2015_774_MOESM2_ESM.pdf [file 13059_2015_774_MOESM2_ESM.pdf]

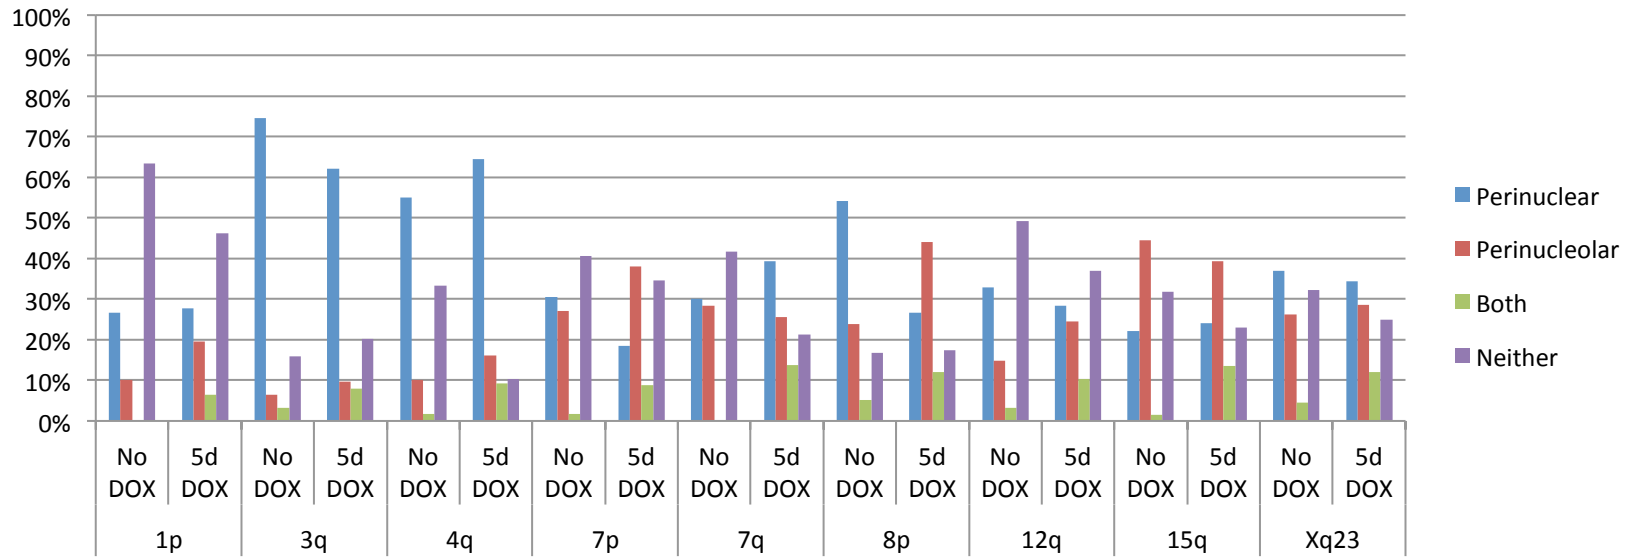

**Additional Data File 2: Location of XIST RNA signal for each integration site with and without DOX treatment.**

The numbers shown are based on three independent experiments for the DOX results and one experiment for the No DOX results, with  $\geq 50$  cells counted for each integration site in each experiment.
