# Supplementary material for: Impact of flanking chromosomal sequences on localization and silencing by the human non-coding RNA XIST
Source: PubMed Central journal article supplement (PMC4591629; doi:10.1186/s13059-015-0774-2), 2015-10-02
Supplement: 13059_2015_774_MOESM3_ESM.pdf [file 13059_2015_774_MOESM3_ESM.pdf]

Additional Data File 3. Candidate gene silencing assays for each integration site.

a

chr1 alpha = 0.0071

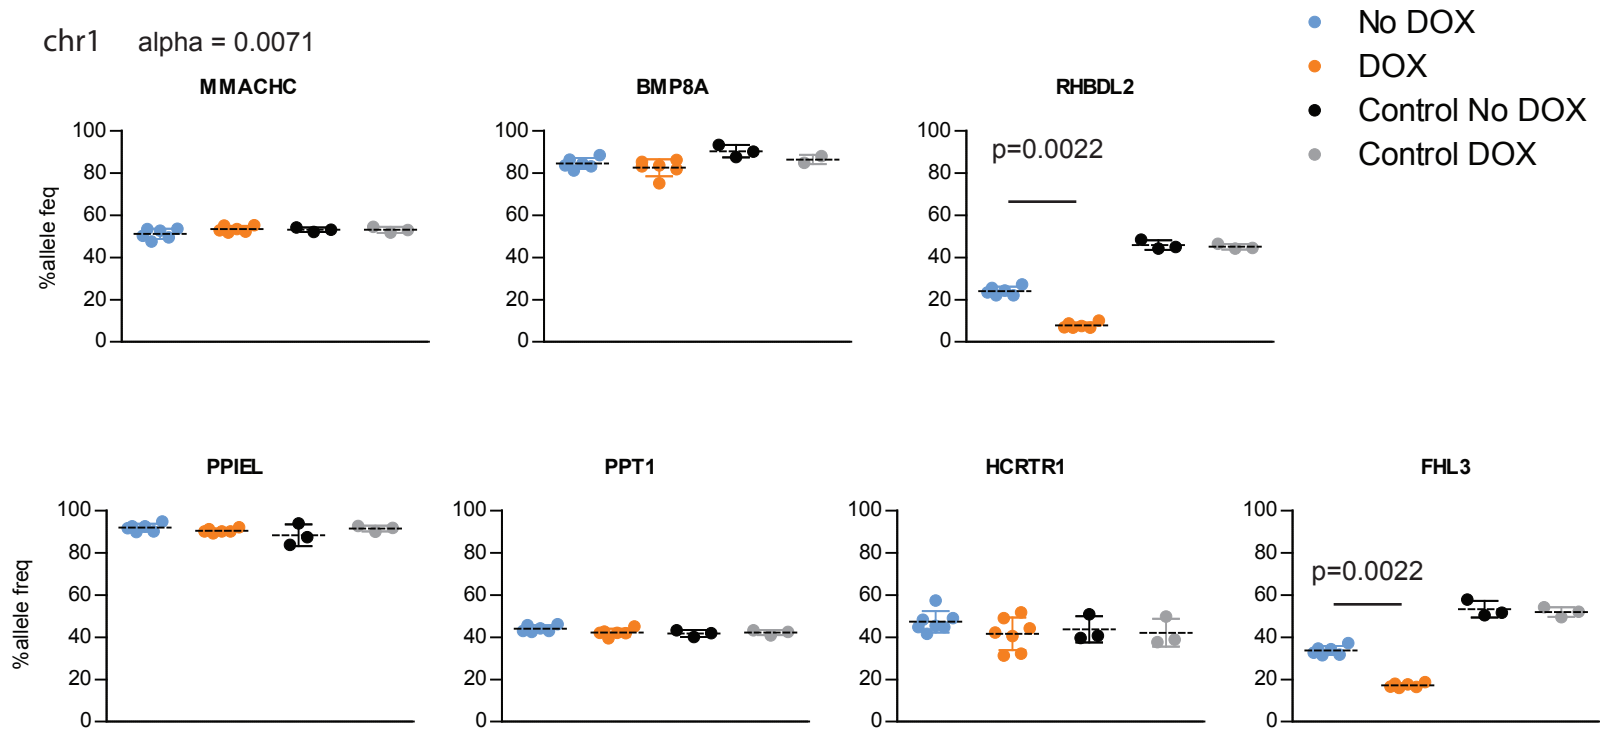

chr4

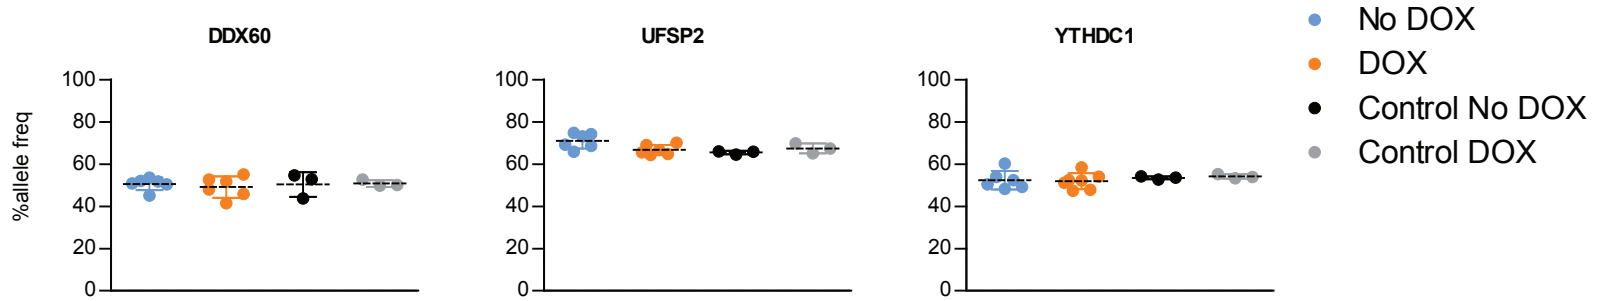

chr7 alpha = 0.0071

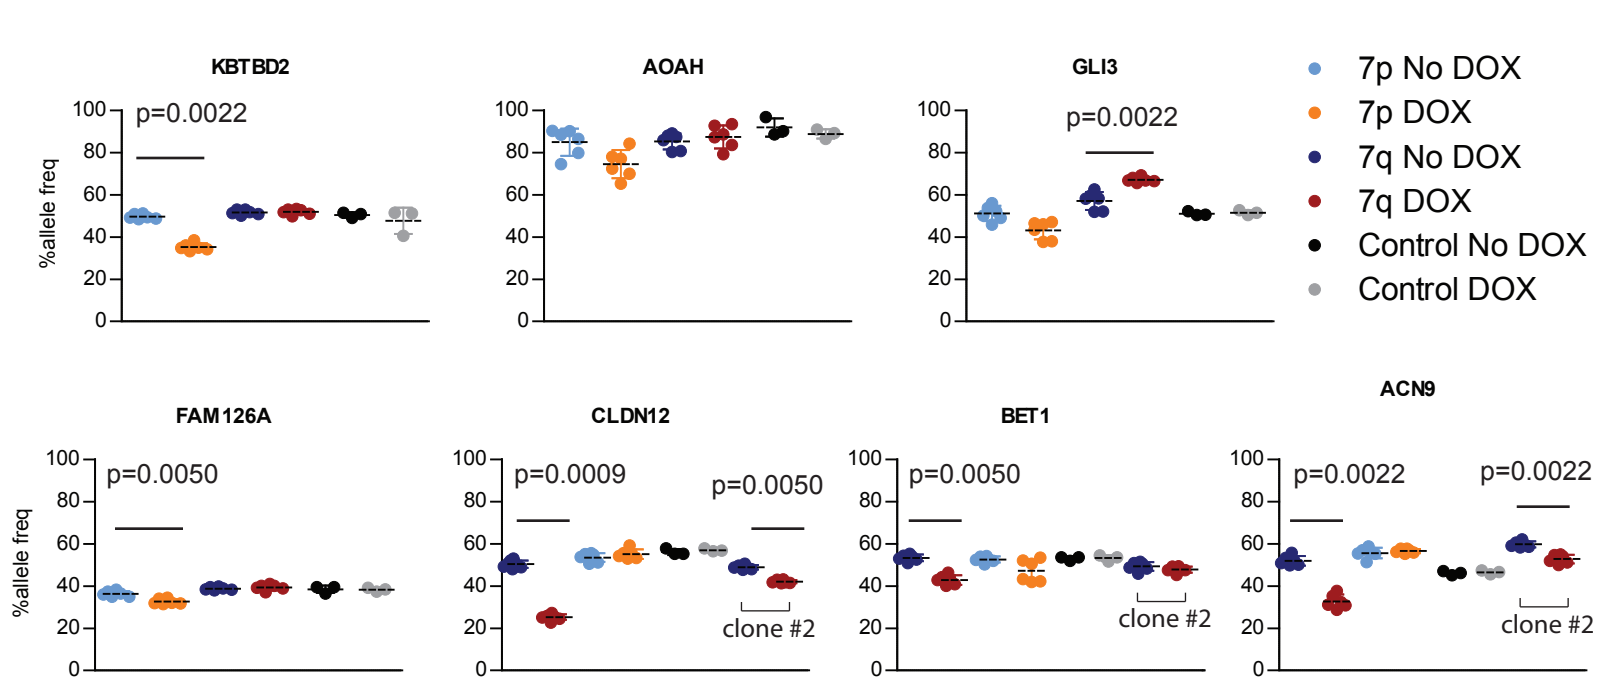

chr8 alpha = 0.0056

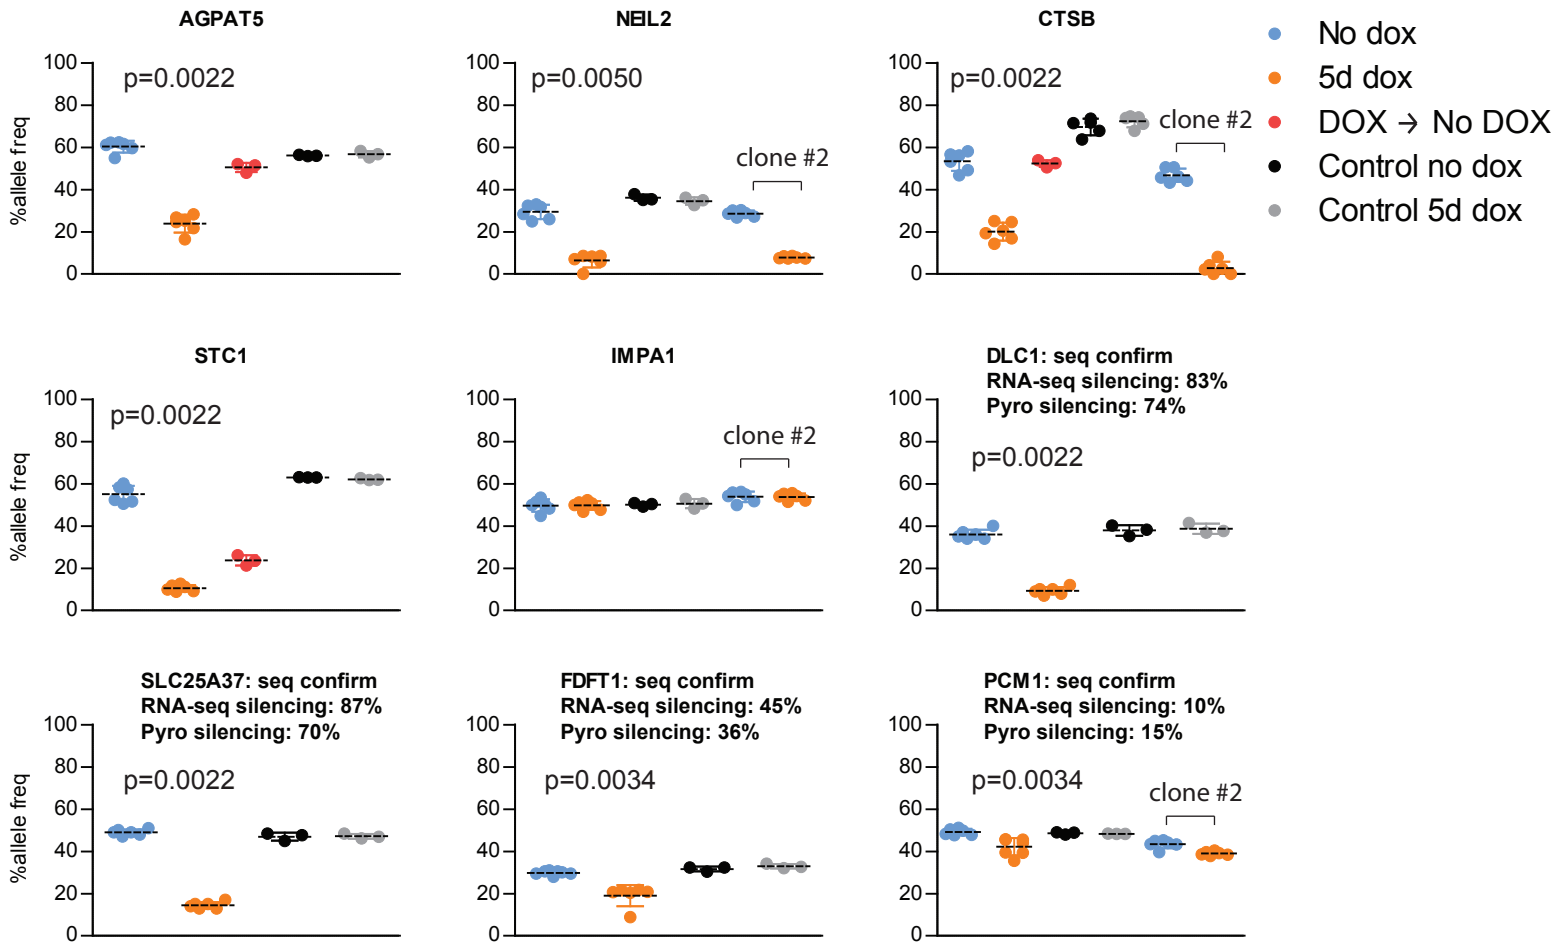

chr12 alpha = 0.0125

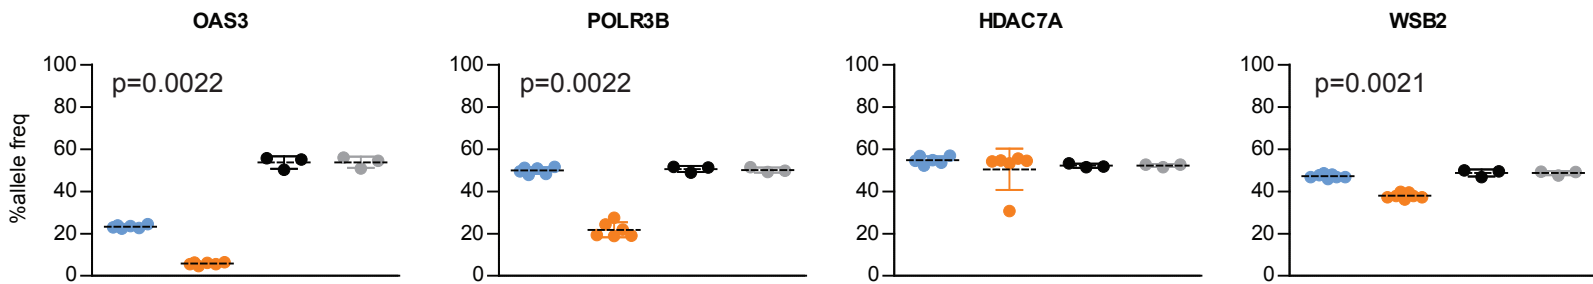

chr15 alpha = 0.0167

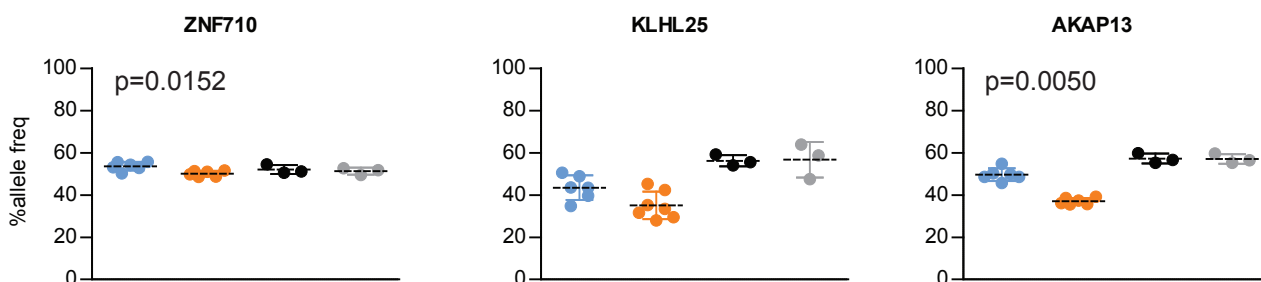

b

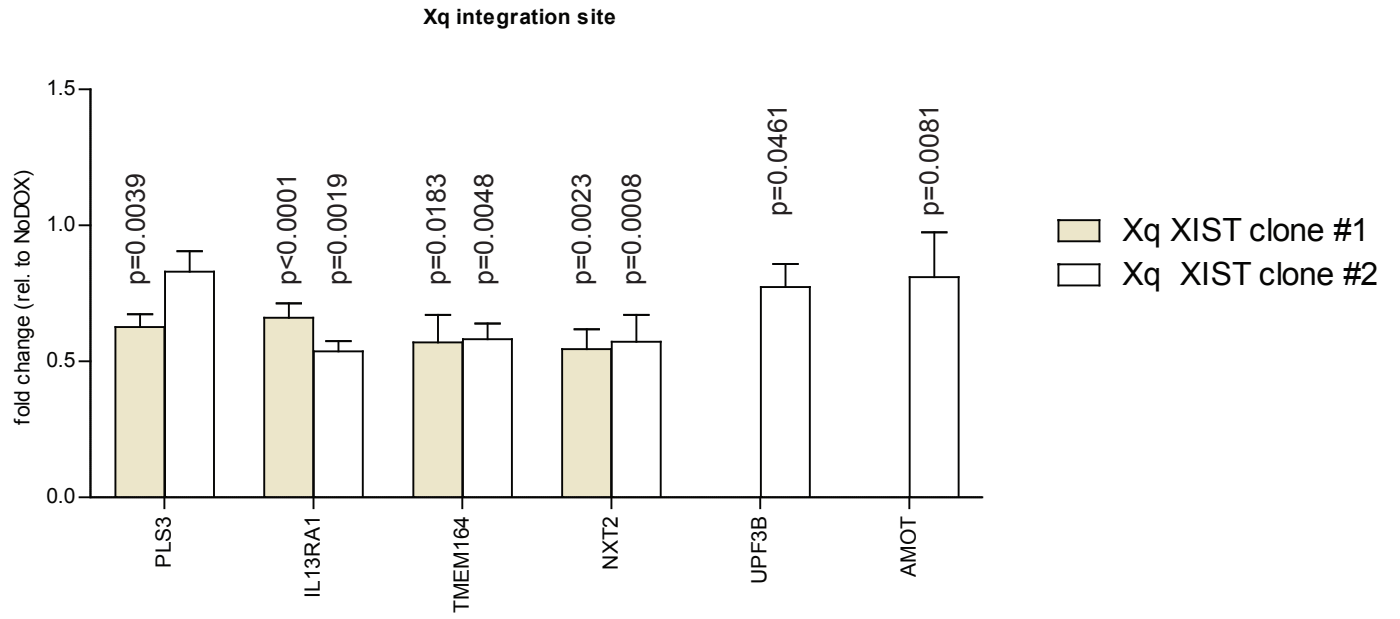

C

1p

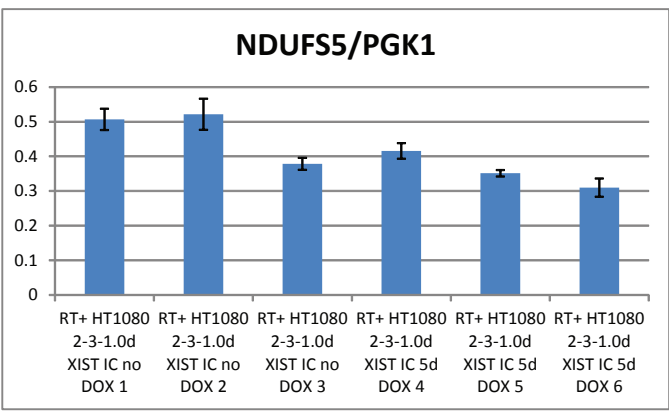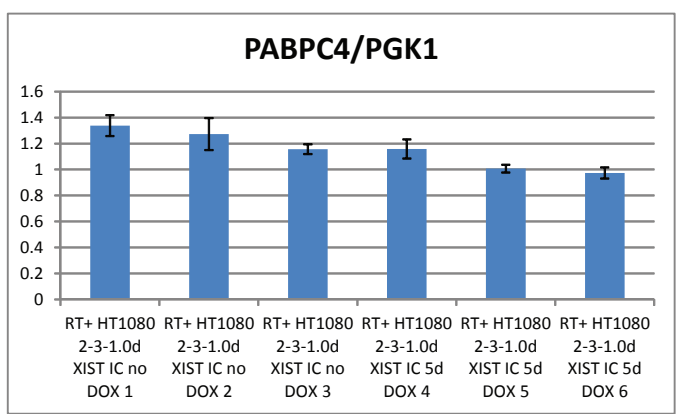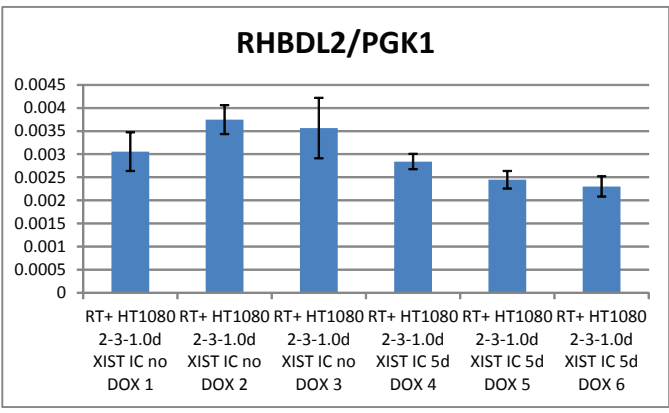

7p

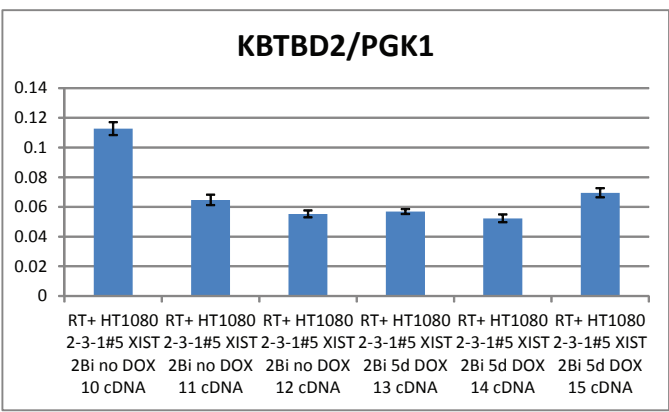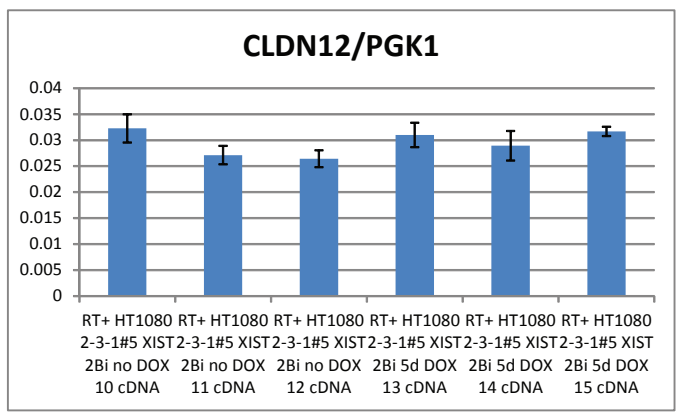

7q

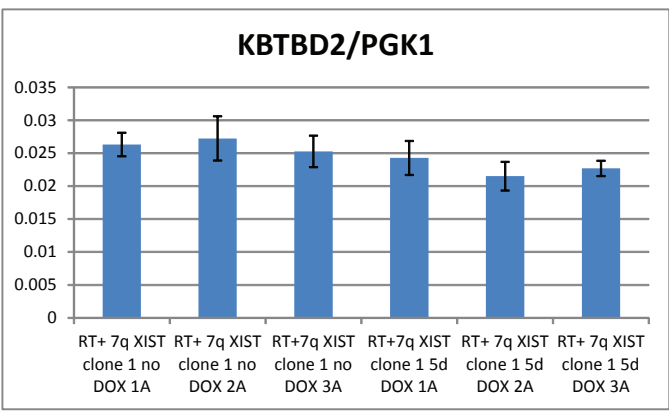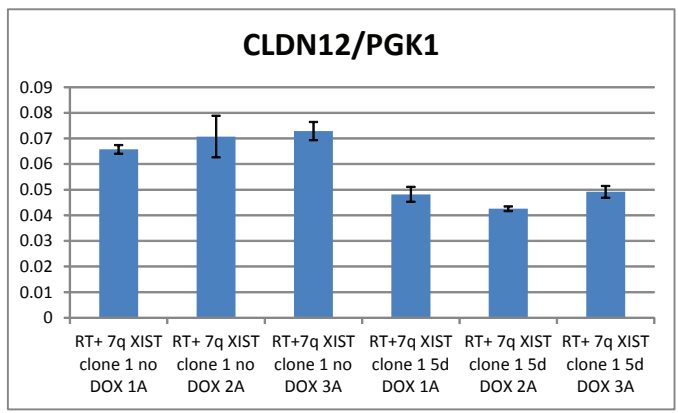

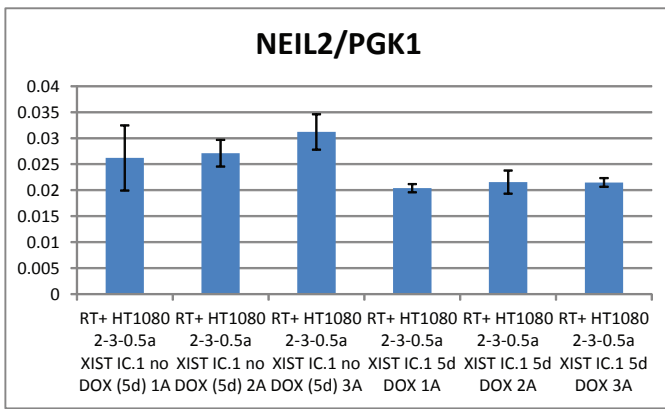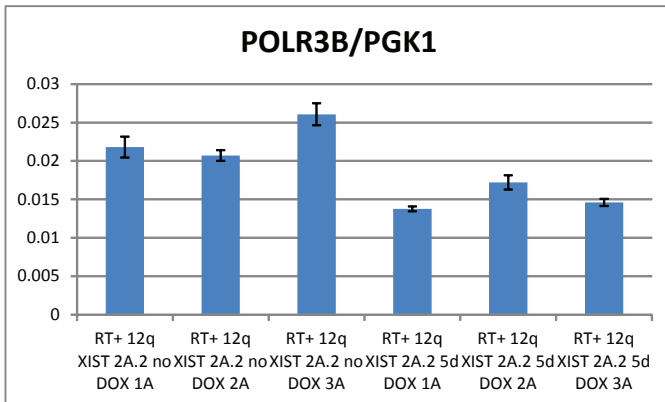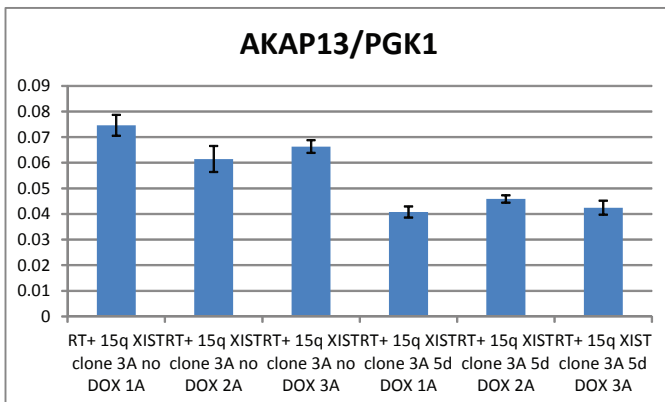

Additional Data File 3. Candidate gene silencing assays for each integration site.

a. Allelic pyrosequencing of three cDNAs from No DOX and DOX were compared in duplicate pyrosequencing reactions. As a control cDNA from a different integration was also assessed. One assay for each integration site was included in Figure 2.

b. For the X-chromosome integration site q-RT-PCR was used to determine silencing as the cells are hemizygous.

c. Q-RT-PCR assays were also performed to validate some autosomal silencing and compare with pyrosequencing and RNA-seq.
