# Supplementary material for: Impact of flanking chromosomal sequences on localization and silencing by the human non-coding RNA XIST
Source: PubMed Central journal article supplement (PMC4591629; doi:10.1186/s13059-015-0774-2), 2015-10-02
Supplement: 13059_2015_774_MOESM5_ESM.pdf [file 13059_2015_774_MOESM5_ESM.pdf]

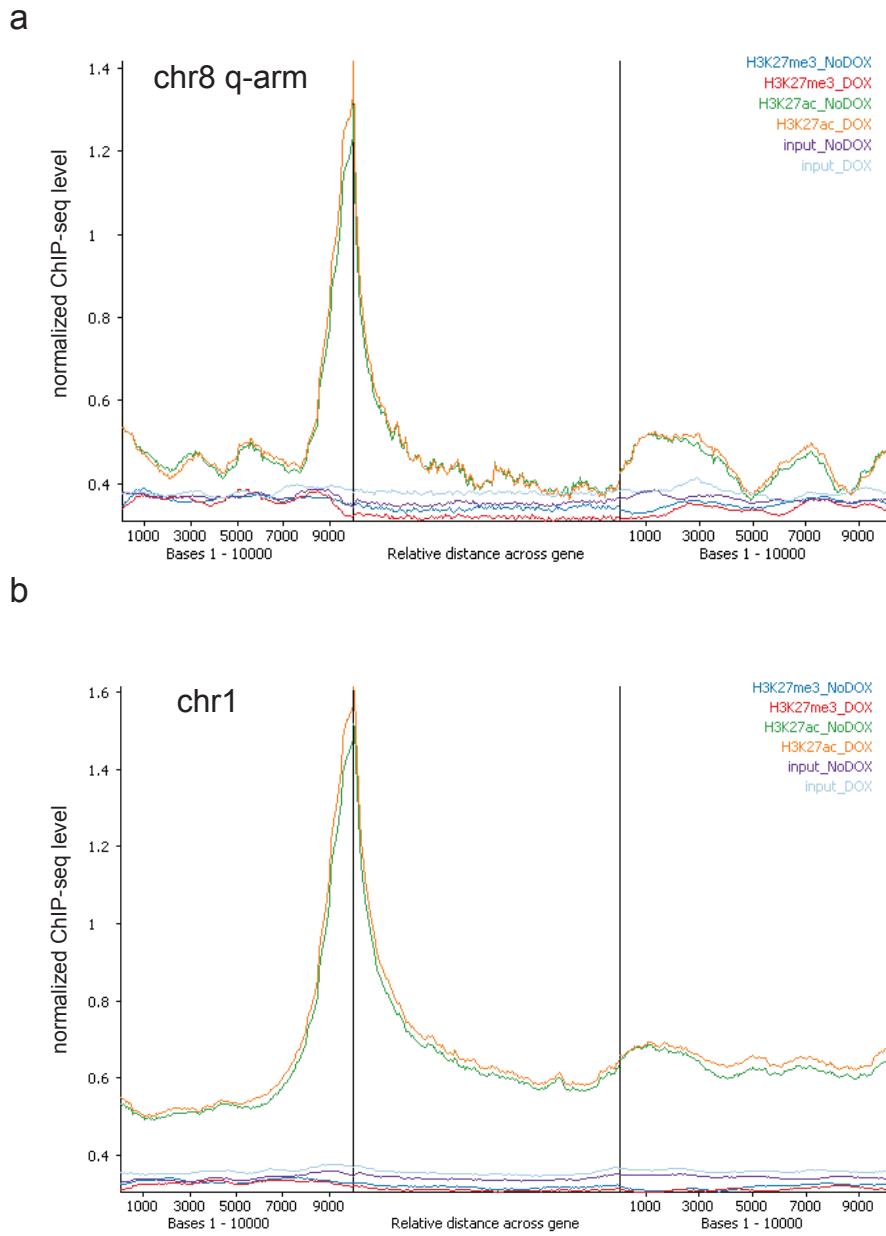

Additional Data File 5. Average H3K27ac and H3K27me3 for genes on 8q (a) and chromosome 1 (b). The normalized ChIP-seq level are shown across a normalized gene and for the 10 kb upstream and downstream before XIST expression (NoDOX) and after XIST expression (DOX).
